# 1 **The Pace of Modern Life, Revisited**

2 Sarah Sanderson<sup>1</sup>, Marc-Olivier Beausoleil<sup>1</sup>, Rose E. O’Dea<sup>1,2</sup>, Zachary T. Wood<sup>3</sup>, Cristian Correa<sup>4,5</sup>,  
3 Victor Frankel<sup>1</sup>, Lucas D. Gorné<sup>1,6,7,8</sup>, Grant E. Haines<sup>1</sup>, Michael T. Kinnison<sup>3</sup>, Krista B. Oke<sup>9</sup>, Fanie  
4 Pelletier<sup>10</sup>, Felipe Pérez-Jvostov<sup>1</sup>, Winer Daniel Reyes-Corral<sup>1</sup>, Yanny Ritchot<sup>10</sup>, Freedom Sorbara<sup>1</sup>,  
5 Kiyoko M. Gotanda<sup>8,10\*†</sup>, and Andrew P. Hendry<sup>1\*</sup>

6 1. Department of Biology and Redpath Museum, McGill University, 859 Sherbrooke Street West,  
7 Montréal, Québec H3A 2K6, Canada

8 2. Evolution & Ecology Research Centre, UNSW, Sydney, Australia

9 3. School of Biology and Ecology and Maine Center for Genetics in the Environment, University  
10 of Maine, Orono, ME, USA.

11 4. Facultad de Ciencias Forestales y Recursos Naturales, Instituto de Conservación Biodiversidad  
12 y Territorio, Universidad Austral de Chile, Valdivia, Chile

13 5. Centro de Humedales Río Cruces, Universidad Austral de Chile, Valdivia, Chile

14 6. Universidad Nacional de Córdoba, Facultad de Ciencias Exactas Físicas y Naturales. Córdoba,  
15 Argentina.

16 7. Consejo Nacional de Investigaciones Científicas y Técnicas, CONICET, IMBiV. Córdoba,  
17 Argentina.

18 8. Department of Biological Sciences, Brock University, St. Catharine’s, ON J2S 3A1

19 9. College of Fisheries and Ocean Sciences, University of Alaska Fairbanks, Juneau, AK, USA

20 10. Département de biologie, Université de Sherbrooke, Sherbrooke, QC J1K 2R1, Canada

21

22 \* Authors contributed equally

23 †Corresponding author: [kgotanda@brocku.ca](mailto:kgotanda@brocku.ca)

24 ABSTRACT

25 Wild populations must continuously adapt to environmental changes or they risk extinction.  
26 Such adaptations can be measured as phenotypic rates of change and can allow us to predict  
27 patterns of contemporary evolutionary change. About two decades ago, a dataset of phenotypic  
28 rates of change in wild populations was compiled. Since then, researchers have used (and  
29 expanded) this dataset to look at microevolutionary processes in relation to specific types of  
30 human disturbances. Here, we have updated the dataset adding 5257 estimates of phenotypic  
31 changes and used it to revisit established patterns of contemporary evolutionary change. Using  
32 this newer version, containing 6920 estimates of phenotypic changes, we revisit the conclusions  
33 of four published articles. We then synthesize the expanded dataset to compare rates of change  
34 across different types of human disturbance. Analyses of this expanded dataset suggests that: 1)  
35 a small absolute difference in rates of change exists between human disturbed and natural  
36 populations, 2) harvesting by humans results in larger rates of change than other types of  
37 disturbances, 3) introduced populations have increased rates of change, and 4) body size does  
38 not increase through time. Overall, findings from earlier analyses have largely held-up in  
39 analyses of our new dataset that encompass a much larger breadth of species, traits, and human  
40 disturbances. Lastly, we found that types of human disturbances affect rates of phenotypic  
41 change and we call for this database to serve as a stepping stone for further analyses to  
42 understand patterns of contemporary evolution.

43

44 KEYWORDS

45 Phenotypic traits, contemporary evolution, rapid evolution, anthropogenic disturbance, human  
46 disturbance, Darwins, Haldanes

## 47 INTRODUCTION

48 The rate at which populations can adapt to environmental change will determine their ability to persist,  
49 thrive, and expand in a changing world. This adaptation is defined by changes in organismal  
50 phenotypes (as opposed to genotypes) – because phenotypes interface with the environment and thus  
51 are the direct determinants of fitness (Alberti et al., 2017; Endler, 1986; Hendry, 2017; Schluter, 2000).  
52 Historically, adaptive phenotypic changes were thought to be very slow, as exemplified by Charles  
53 Darwin’s statement that “*we see nothing of these slow changes in progress until the hand of time has*  
54 *marked the long lapse of ages*” (Darwin, 1859). This assumption began to crumble with the  
55 accumulation of studies documenting so-called “rapid evolution.” Some famous early examples of this  
56 phenomenon included industrial melanism in peppered moths (Kettlewell, 1973), body size in mice  
57 colonizing islands (Berry, 1964), body size and colour in house sparrows invading North America  
58 (Johnston & Selander, 1964), and resistance of plants to pollutants found in mine tailings (Antonovics  
59 & Bradshaw, 1970). In most of these early examples from nature, it was unclear whether the observed  
60 phenotypic changes were genetic as opposed to plastic. It was therefore game-changing when a series  
61 of common-garden experiments confirmed that at least some rapid phenotypic changes seen in nature  
62 are, in fact, genetically based (Al-Hiyaly, Mcneilly, & Bradshaw, 1990; Reznick, 1982; Stearns, 1983;  
63 Wu & Kruckeberg, 1985).

64 At the end of the 20<sup>th</sup> century, it remained unclear if the documented cases of rapid phenotypic  
65 change were rare exceptions or the tip of the iceberg. Resolving this uncertainty required broader  
66 literature surveys and a quantitative standard for calculating and comparing rates of phenotypic change.  
67 A precedent already existed in the literature because paleontologists had long been calculating rates of  
68 phenotypic change in fossil time series (Gingerich, 1983, 1993; Haldane, 1949). Following that  
69 precedent, Hendry and Kinnison (1999) combed the literature for examples of phenotypic change on  
70 contemporary time scales and calculated rates of change using two classic metrics (“darwins” and

71 “haldanes”). The authors concluded that “[...] *evolution as hitherto considered “rapid” may often be*  
72 *the norm and not the exception*” (Hendry & Kinnison, 1999). They further advocated use of the general  
73 term “contemporary evolution” because “rapid evolution” requires formal confirmation of  
74 exceptionally rapid rates. This original paper, and the follow-up analysis of Kinnison and Hendry  
75 (2001), opened the flood-gates to a series of influential papers analyzing the dataset of rates of  
76 phenotypic change to answer a series of evolutionary questions (Alberti et al., 2017; Crispo et al., 2010;  
77 Gorné & Díaz, 2019; Gotanda, Correa, Turcotte, Rolshausen, & Hendry, 2015; Hendry, Farrugia, &  
78 Kinnison, 2008; Hendry & Kinnison, 2001; Palkovacs, Wasserman, & Kinnison, 2011; Westley, 2011).  
79 The studies also made the case that evolution operates on scales large enough to have ecological  
80 outcomes, leading the way into the field of eco-evolutionary dynamics (Des Roches et al., 2018;  
81 Fitzpatrick et al., 2015).

82         The number of studies available for calculating rates of phenotypic change has increased  
83 dramatically over the last decade or so. Compared to the last published version of the dataset that  
84 contained only populations in the wild (Alberti et al., 2017), the new dataset has increased from 1663 to  
85 6920 rates, 89 to 184 studies, 175 to 1540 systems (Box 1), and 155 to 297 species. Hence, our first  
86 goal in the current paper is to present a new quality-controlled and much-expanded database of  
87 contemporary phenotypic changes in nature – The Phenotypic Rates of Change Evolutionary and  
88 Ecological Database (PROCEED) Version 5.0. This new database is publicly available at Dryad and  
89 <https://proceeddatabase.weebly.com/>. Our second goal was to use the new dataset to revisit previous  
90 analyses and conclusions based on earlier versions of the dataset. Specifically, we wanted to ask four  
91 questions: 1. Does the evidence still support the conclusion from Hendry et al., (2008) that phenotypic  
92 change is greater in human-disturbed systems than in more “natural” systems (see also Alberti et al.,  
93 2017)? 2. Does the evidence still support the conclusion from Darimont et al., (2009) that phenotypic  
94 changes are most rapid when humans act as predators, such as during harvesting (see also Sharpe &

95 Hendry 2009)? 3. Does the evidence still support the conclusion from Westley (2011) that introduced  
96 populations do not drive particularly rapid phenotypic changes, relative to non-introduced populations?  
97 4. Does the evidence still support the conclusion from Gotanda et al., (2015) that no evidence exists for  
98 microevolutionary trends toward increasing body size – as had been suggested to follow from “Cope’s  
99 Rule” (J. Kingsolver & Pfennig, 2004)?

100 The inclusion of 5257 additional data entries might change earlier conclusions for either of two  
101 reasons: (1) biases in earlier data compilations such as underrepresented or missing taxa and  
102 disturbances, or (2) statistical limitations including small sample sizes associated to taxonomic levels or  
103 types of studies (i.e., genetic; Box 1). To assess the first possibility, we re-analyze the new dataset  
104 using the same methods as the original authors: that is, Hendry et al., (2008), Darimont et al., (2009),  
105 Westley (2011), and Gotanda et al., (2015). Through this approach, we can assess if previous  
106 approaches yield similar conclusions following the accumulation of more data. To assess the second  
107 possibility, we use updated statistical models in a comprehensive approach to ask: 5. Do any types of  
108 human disturbances stand out in terms of their effects on contemporary rates of phenotypic change  
109 (Pelletier & Coltman, 2018). We envision this last analysis as a precursor to what will surely be  
110 additional analyses of the new (and future) dataset with current and future statistical approaches. To  
111 synthesize, we propose a new perspective on how to study contemporary rates of change in future  
112 studies.

## 113 METHODS & RESULTS

### 114 *Database development*

115 The current dataset has a series of notable changes relative to earlier versions of the dataset. First, we  
116 added new data that met the necessary criteria (phenotypic traits were quantified from natural  
117 populations of the same species either at two time points in the same populations or in two populations

118 with known divergence time), and recorded meta-data as described in Box 1. Second, we modified and  
119 expanded the categorization of types of human disturbances as defined in Box 2. Third, we checked  
120 both old and new data entries to fix any errors. These efforts were facilitated by – whenever possible –  
121 obtaining summary data (means, sample sizes, and standard deviations) directly from tables, figures, or  
122 by contacting authors, from which we calculated rates of change (details below).

123

#### 124 *The data*

125 Here we outline processes common to all analyses. First, all statistical analyses were performed  
126 in R environment 4.0.5 (R Core Team, 2021). Second, we only include studies where the number of  
127 generations elapsed was 300 or fewer, which is suitable for analyses of “contemporary” change  
128 (Hendry et al., 2008). Third, most analyses were conducted using both darwins and haldanes – because  
129 the two metrics have different biological and statistical properties, as well as different data  
130 requirements (Gingerich, 1993; Hendry & Kinnison, 1999; Hunt, 2012). Darwins are defined as the  
131 proportional change in the mean trait value in units of  $e$  per million years and are appropriate for data  
132 on a ratio scale, but not an interval scale (Box 1). Darwins were calculated as

$$D = \frac{\ln(X_2) - \ln(X_1)}{10^6 \text{ years}},$$

133 where  $X_1$  and  $X_2$  are either mean trait values for one population at times 1 and 2 or mean trait values  
134 for two populations that had a common ancestor at a known time in the past, which then scales “time”  
135 as million years in the denominator. Haldanes are the change in the mean trait value in standard  
136 deviations per generation. Haldanes were calculated as

$$H = \frac{\left(\frac{X_2}{SD_p}\right) - \left(\frac{X_1}{SD_p}\right)}{g},$$

137 where  $\bar{X}_1$  and  $\bar{X}_2$  are the mean trait values as explained above,  $SD_p$  is the pooled standard deviation of  
138 the two samples, and  $g$  is the elapsed time in generations (i.e., number of years divided by generation  
139 length (Box 1)).

140 The response variable in all subsequent analyses was the numerator of the rate metric (i.e., darwin  
141 or haldane numerator). For all analyses (except questions 3 and 4) we used the mean amount of  
142 phenotypic change for a given system (Box 1) to avoid nonindependence of data points within a system  
143 (Hendry & Kinnison, 2001). Finally, we calculated effect sizes using partial  $\eta^2$  to compare the original  
144 studies to the updated ones. We now present analyses specific to each question, their respective results,  
145 and a brief discussion of results.

## 146 THE QUESTIONS

147 *Question 1: Are rates of phenotypic change greater in human-disturbed systems?*

148 Humans cause particularly dramatic environmental changes, and so we might expect human  
149 disturbance to accelerate rates of phenotypic change. Consistent with this idea, Hendry et al., (2008)  
150 reported that phenotypic rates of change were higher for populations in human-disturbed systems than  
151 for populations in more “natural” systems that were not subject to direct human disturbance. To  
152 replicate that original analysis with our new dataset, we used analysis of covariance (ANCOVA) to  
153 assess whether the absolute amount of phenotypic change (darwin or haldane numerator) differed  
154 between the two general contexts (human-disturbed or natural) while controlling for the length of the  
155 time interval (years for darwins, generations for haldanes).

156 As in Hendry et al., (2008), our new dataset suggests that rates of change were generally higher  
157 in human-disturbed systems compared to natural systems (Fig. 1; Fig. S1). The difference between  
158 contexts (human-disturbed versus natural) was, however, reduced in our new dataset,  $\eta^2 = 0.018$ ,  
159 compared to the original analysis,  $\eta^2 = 0.115$ , (Fig. 1; Fig. S1; Table 1). This smaller difference could  
160 result from confounding effects of multiple types of disturbances (Galton, 1886; Kelly & Price, 2017;

161 Pelletier & Coltman, 2018). That is, it can be difficult to assign a single type of human disturbance to a  
162 particular system. For example, climate change is likely to affect all systems indirectly, including  
163 systems we have classified as “natural.” Here, we classified disturbance as climate change only if the  
164 original study specifically tested for an effect of climate change. We will later return to the influence of  
165 these multiple disturbances on inferences about contemporary evolution. Our expanded dataset could  
166 also mean that effects like winnowing, which would reduce the number of populations with low rates  
167 of phenotypic change because they are more likely to go extinct (Hendry et al., 2008), do not appear to  
168 have a strong overall effect.

169 By comparing estimates from wild populations versus those from common-garden or animal  
170 model analyses (Box 1), Hendry et al., (2008) concluded that plasticity likely contributed substantially  
171 to the rate differences between human-disturbed and more natural contexts (Fig. S2; Fig. S3). This  
172 suggestion arose because the difference between contexts was lower when common-garden or animal  
173 model studies were used – and because large changes could sometimes be seen immediately after a  
174 disturbance (Hendry et al., 2008). Such patterns also occurred in the present study supporting those  
175 original inferences (Fig. S2; Fig. S3). At the same time, it is important to note that genetic changes  
176 definitely occurred in a number of studies, but that many of the most disturbed contexts (e.g.,  
177 harvesting) are not particularly amenable to the assessment of genetically-based phenotypic change.  
178 Only 24% of the phenotypic change entries in our dataset could be labelled as genetically based,  
179 provided an adequate experimental design.

180

181 *Question 2: Are particularly rapid and consistent changes associated with harvesting?*

182 A particularly strong and consistent disturbance that directly impacts some populations occurs  
183 when humans act as a predator, such as in cases of harvesting. To explore this idea, Darimont et al.,  
184 (2009) took the human-disturbed versus natural distinction of Hendry et al., (2008) and divided the



185 human-disturbed systems into those experiencing direct harvesting versus those experiencing other  
186 forms of human disturbances. After adding more data, especially to the harvesting category, Darimont  
187 et al., (2009) reported that populations subject to harvesting had increased phenotypic rates of change  
188 compared to other types of human disturbance and also compared to natural systems. To replicate that  
189 original analysis with our updated dataset, we used ANCOVA to compare darwin numerators  
190 associated with harvesting to those associated with other types of human disturbances (combined) and  
191 those associated with more natural systems – while including time (years) as a covariate. We ran  
192 ANCOVAs using both mean and maximum rates of change per system to replicate the original study.

193         As in Darimont et al., (2009), our new data suggested that phenotypic changes associated with  
194 harvesting are greater than those associated with other types of human disturbances or natural systems  
195 (Fig. 2; Fig S4; Table 1). However, the effect size (partial  $\eta^2$ ) of human disturbance (three contexts:  
196 harvesting, other human disturbance, or natural) decreased from 0.180 in the original study to 0.010 in  
197 the updated dataset (Table 1). We suggest that this decrease in effect size is mainly driven by large  
198 datasets containing many study systems with high variation. As an example, when we remove the Oke  
199 et al., (2020) and Clark et al., (2018) datasets, the effect size of human disturbance increases to 0.139  
200 (Fig. S5). These datasets correspond to salmonid data for 1072 populations from four species over a  
201 time frame of up to 77 years. Of these populations, 60% are (or were) likely subject to harvest – and so  
202 needed to be added to that category in the present analysis. The remaining 40% of populations were  
203 added to the natural category. However, the strength and type of harvest is expected to be highly  
204 variable among those species and populations. We note that this variability in harvest strength is likely  
205 true for most harvested populations. This issue again highlights the difficulty of unambiguously  
206 assigning human disturbances to systems that are surely experiencing multiple types of disturbance that  
207 vary in type and intensity across systems.

208           Despite the lower effect size for harvesting in our new dataset, we note that harvested systems  
209 represented 35 of the 50 largest mean phenotypic changes in the dataset. Hence, it seems likely that  
210 humans as predators generate a diversity of rates of change – from many slow rates to some truly  
211 exceptionally high rates. Our findings continue to support the claims of fisheries and hunting wildlife  
212 scientists who have long argued the lasting effects of harvesting on some (but not all) natural  
213 populations (Kuparinen & Festa-Bianchet, 2017; Morrissey, Hubbs, & Festa-Bianchet, 2021; Pigeon,  
214 Festa-Bianchet, Coltman, & Pelletier, 2016; Van de Walle, Pigeon, Zedrosser, Swenson, & Pelletier,  
215 2018).

216

217 *Question 3: Do introduced populations show particularly rapid rates of change?*

218           When a species is introduced into a new location, it often experiences massive shifts in biotic  
219 and abiotic conditions, which are expected to cause particularly rapid phenotypic changes (Carroll,  
220 2007; Cox, 2004; Huey, Gilchrist, & Hendry, 2005; Kinnison, Unwin, & Quinn, 2008). However,  
221 Westley (2011) used an earlier version of this dataset to report that introduced populations do not – in  
222 fact – evince particularly strong or consistent phenotypic changes when compared to non-introduced  
223 populations. To replicate their analysis, we first averaged rates by species and then used ANCOVA to  
224 compare the magnitude of phenotypic change (darwin and haldane numerators) between introduced  
225 (disturbance classified as introduced) and non-introduced (all other disturbance categories) populations  
226 with time (years or generations) as a covariate (Westley, 2011).

227           We found that, on average, introduced populations have higher rates of change than non-  
228 introduced populations (Fig. 3; Fig. S6). Although the difference between introduced and non-  
229 introduced populations is marginal, the addition of our new data increased the effect size (Table 1).  
230 This finding is consistent with the evidence that introduced populations do sometimes show very rapid  
231 rates of change (Fig. 3). For example, zebra mussels (*Dreissena polymorpha*) introduced in European

232 lakes rapidly shifted their growth rates (Czarnoleski et al., 2005) and Eastern grey kangaroos,  
233 (*Macropus giganteus*) introduced from Tasmania to Maria Island rapidly shifted their behaviour when  
234 no longer subject to predation (Blumstein & Daniel, 2003). This is consistent with Westley's  
235 conclusion that a small number of introduced species having very high rates of change drove the  
236 perception that introduced species show rapid change. Indeed, the updated dataset has both very high  
237 rates and very low rates of change in introduced populations (Fig. 3).

238 Populations introduced to a new habitat likely experience abrupt directional selection that drives  
239 rapid evolutionary rates compared to non-introduced populations (Carroll, 2007; Cox, 2004). Once a  
240 population achieves adaptive optima and is more locally adapted, phenotypic rates of change are  
241 expected to decline with time (Fig. 3). This expectation is consistent with the declining rates of change  
242 with time since introduction (Figs. 1 & 2 in Westley 2011), although that pattern is also consistent with  
243 other processes (Hendry & Kinnison, 2001). These processes include averaged rates over longer time  
244 spans or depletion of genetic variation (Kinnison & Hairston, 2007). Finally, we note that both  
245 introduced and non-introduced populations are also experiencing other types of human disturbances  
246 that can influence their rates of evolution, thus potentially obscuring effects of introduction per se.

247

248 *Question 4: Are body sizes increasing through time as suggested by Cope's Rule?*

249 Cope's Rule states that lineages generally evolve larger body sizes over evolutionary time  
250 (Cope, 1885). Based on an analysis of selection estimates, Kingsolver and Pfennig (2004) argued that  
251 evidence of directional selection for larger body size in contemporary populations is consistent with a  
252 microevolutionary explanation for Cope's Rule. However, when looking for evidence of general trends  
253 toward larger mean body size in contemporary populations, Gotanda et al., (2015) found no such trend  
254 and instead found a general trend towards decreasing body size.

255 To replicate the analysis of Gotanda et al., (2015), we used the raw (i.e., signed, rather than  
256 absolute value) estimates of haldane and darwin numerators for allochronic studies (Box 1). The  
257 original analysis did not average per system or species, and so all new analyses are similarly based on  
258 individual rates. We first square-root transformed 2-D traits (e.g., surface area) and cube-root  
259 transformed 3-D traits (e.g., volume or mass) and then compared rates for body size traits to rates for  
260 other types of traits in a one-tailed Wilcoxon rank-sum test (see Gotanda et al., 2015 for details). We  
261 next conducted a sign test to determine whether the change in body size within populations was more  
262 commonly positive or negative. Finally, we re-ran the sign tests excluding rates calculated from  
263 populations known to be subject to harvesting – as harvesting is expected to cause particularly rapid  
264 decreases in body size (Darimont et al., 2009; Sharpe & Hendry, 2009; see question 2).

265 When compared to other traits, rates of change for body size are not larger (Table 2; Fig S7). As  
266 in the original analysis of Gotanda et al., (2015), rates of change in body size are more often negative  
267 (organisms are getting smaller overall), even when excluding populations subject to harvesting (Table  
268 3; Fig. 4; Fig S8). Further, rates of change for body size are not more positive (or less negative) when  
269 compared to other traits (Table 3; Fig. S8), and the type of human disturbance does not appear to affect  
270 rates of change on body size (Fig. 4). These results are matched by other recent analyses of body size  
271 trends in a variety of taxa (Gardner, Peters, Kearney, Joseph, & Heinsohn, 2011; Sheridan & Bickford,  
272 2011). For instance, recent research suggests that body sizes are broadly decreasing as a response to  
273 climate change perhaps due to effects of increasing temperature and variable precipitation on  
274 organismal development and growth (Fryxell et al., 2020; Sheridan & Bickford, 2011).

275

276 *Question 5: Does any type of disturbance stand out with respect to rates of change?*

277 Based on the previous studies we have now revisited, as well as more recent reviews (Pelletier  
278 & Coltman, 2018), we expect associations between high rates of phenotypic change and particular

279 types of human disturbances such as pollution (Hamilton, Rolshausen, Uren Webster, & Tyler, 2017),  
280 harvesting (Sullivan, Bird, & Perry, 2017), or landscape change (Legrand et al., 2017). Using our  
281 extensive dataset, we are now able to ask if these or other types of human disturbances stand out with  
282 respect to rates of phenotypic change.

283 To answer this question, we used a more advanced analysis – in contrast to the above questions.  
284 We used general linear models in which the response variables were log<sub>10</sub>-transformed absolute  
285 darwin (or haldane) numerators, and independent variables included type of human disturbance, time  
286 (years and generations, log<sub>10</sub>-transformed), and type of study (genetic or phenotypic). As in question 4,  
287 we first square-root transformed 2-D traits (e.g., surface area) and cube-root transformed 3-D traits  
288 (e.g., volume or mass) before log transforming the rates. Finally, we used Tukey post-hoc tests  
289 (Hothorn, Bretz, & Westfall, 2008) to explore the differential effects of disturbances on differences in  
290 rates of evolution.

291 This new analysis suggests that time (years, but not generations) had a significant positive  
292 impact on darwin rates of change, but type of study (genetic vs. phenotypic) did not (Table 4; Table  
293 S2). We also found that systems associated with pollution have the highest rates of change and that  
294 systems associated with climate change have the slowest rates of change (Fig. 5; Fig S9). We should  
295 note that, within our dataset, most systems looking at the impact of pollution were plants, which might  
296 or might not influence the high rates for this type of disturbance. In short, more work needs to be done  
297 to explore potential interactive effects of disturbance type and taxonomic group on rates of change.

298 Surprisingly, on average, phenotypic changes associated with climate change were amongst the  
299 slowest. We suspect that climate change has broad reaching effects and is especially difficult to assign  
300 as a particular sole causal force. Indeed, climate change must be – at some level – influencing all or  
301 most systems included in the dataset, regardless of the disturbance category to which we assigned  
302 them. Furthermore, studies focusing on trait change in response to climate change are likely to focus on

303 the more gradual aspects of climate change, such as shifting seasonality and temperature increases  
304 (Parmesan & Yohe, 2003), rather than abrupt aspects such as heat waves, storms, and droughts. This  
305 focus could therefore underestimate the evolutionary impacts of climate change. More importantly,  
306 climate change can be a particularly noisy environmental driver and so, is especially prone to temporal  
307 averaging (Hendry & Kinnison, 1999). In fact, few studies in nature follow populations long enough  
308 and at a fine enough temporal resolution to detect fast and large phenotypic changes (e.g., Grant &  
309 Grant, 2002). For these reasons, we replicate the analyses by including all populations affected by  
310 climate change as “natural” (Fig S10). The results from this analysis confirm that whether we have a  
311 disturbance category dedicated to climate change, or if we include climate change with “natural”  
312 systems, our conclusions do not change: climate change and natural systems are still amongst the  
313 slowest rates of evolution. Regardless, our new analysis provides the most comprehensive hypothesis  
314 (Fig. 5) for how various types of disturbance differ in their effects on rates of phenotypic change.

315

## 316 DISCUSSION

317 Conclusions from analyses of earlier datasets of contemporary phenotypic change have largely  
318 been upheld in analyses of our new dataset that encompasses a much larger breadth of species, traits,  
319 and human disturbances. 1) Human disturbed systems have slightly larger rates of phenotypic change  
320 than do natural systems (Fig. 1). 2) Harvesting by humans results in larger rates of change compared to  
321 other types of disturbances (Fig. 2). 3) Introduced populations have higher rates of change than non-  
322 introduced populations (Fig. 3). 4) There is no trend for increasing body size through time (Fig. 4). 5)  
323 Systems affected by pollution have larger rates of change compared to other types of disturbances (Fig.  
324 5).

325 Overall, contemporary rates of phenotype change range from very slow to very fast (relative to  
326 other rates), with the latter typically gaining the most attention. This pattern is found in other datasets  
327 focusing on estimates of selection in natural populations (Kingsolver et al., 2001; Siepielski et al.,  
328 2013). Our database includes some striking examples of rapid phenotypic rates of change. For example,  
329 horn size in bighorn sheep (*Ovis canadensis*) decreased by 10% over 19 years when targeted by trophy  
330 hunters (Pigeon et al., 2016); body length in harvested Chinook salmon (*Oncorhynchus tshawytscha*) in  
331 the Yukon River of Alaska has decreased by 5-7% since the late 1970s (Ohlberger et al., 2020); zinc  
332 tolerance in tufted hairgrass (*Deschampsia cespitosa*) in zinc-contaminated soils increased by 80% over  
333 26 years (Al-Hiyaly et al., 1990); and total egg count in soapberry bugs (*Jadera haematoloma*)  
334 adapting to an introduced host decreased by 8% over 38 years (Carroll, Klassen, & Dingle, 1998).  
335 Human influences clearly shape these and many other phenotypic responses; yet the high levels of  
336 variation in rates of response make the most consistent and dramatic influences hard to confirm.

337 Our primary goal in the present paper is to make the new database available to any researchers  
338 seeking to leverage phenotypic rates of change to answer questions in ecology, evolution, or  
339 conservation biology. For instance, we anticipate that researchers will use the new database to answer a  
340 series of questions relevant to contemporary evolution and for better understanding and predicting how  
341 wild populations will adapt (or not) to human disturbances. Some examples of questions left  
342 unanswered, or only lightly broached in prior reviews include: Do different organisms or trait types  
343 evolve at different rates? Are different disturbances generating confounding or synergistic effects?  
344 What are the upper and lower limits to sustainable versus unsustainable evolutionary rates in nature?

345 The use of this new database should be accompanied with an understanding of its limits and the  
346 resulting caveats of inference.

- 347 1. We suspect a strong ascertainment bias where researchers tend to study systems they  
348 suspect are strongly affected by human disturbances (e.g., harvested fish populations) or  
349 where phenotypic changes are already documented (e.g., phenology). Thus, average  
350 effect sizes for a given disturbance might well decrease with the accumulation of more  
351 diverse and objective sets of data – as we have shown above with the decrease in  
352 average rates of change for harvested systems after we added the 1320 rates from Oke et  
353 al., (2020) and Clark et al., (2018) (Fig. S5). These rates associated with body size  
354 declines in salmonids were calculated from data collected by the Alaska Department of  
355 Fish and Game and collaborators. As such, these rates represent a very broad sampling  
356 of populations across Alaska, not a narrow dataset on just the most impacted  
357 populations. Another form of ascertainment bias occurs when disturbances cause some  
358 populations to go extinct, in which case their rate of phenotypic change cannot be  
359 measured (Hendry et al., 2008). It is currently unknown whether this winnowing effect  
360 of extinction (Hendry et al., 2008) biases rates upward (i.e., slower-changing  
361 populations are more likely to perish) or downward (i.e., faster-changing populations are  
362 more likely to perish – likely because they are experiencing more disturbance).
- 363 2. Seeking to attribute a particular phenotypic change to a single disturbance (e.g., climate  
364 change) is problematic because most populations will be subject to multiple  
365 disturbances – and the degree of a given disturbance will vary dramatically among  
366 systems. Thus, we encourage future work to consider variation in disturbance intensity  
367 (rather than just presence). As examples, one could relate the strength of harvesting on  
368 populations (e.g., local catch rates data) to the rate of change in size or age (e.g., Sharpe  
369 & Hendry, 2009) or the rate of climate change experienced by populations (e.g., local



370 temperature change) to their specific rate of trait change (e.g., Franks, Sim, & Weis,  
371 2007; Jenni & Kéry, 2003).

372 3. The genetic and plastic contributions to trait change remain uncertain for most traits in  
373 most systems (Merilä & Hendry, 2014). As more studies accumulate, we might be able  
374 to profitably analyze only genetically based phenotypic change, such as from common-  
375 garden, reciprocal transplants, or animal-model studies. Regardless, we highlight the  
376 importance of controlled experiments in combination with phenotypic change in the  
377 wild for several reasons: some populations cannot be analyzed with common-garden or  
378 animal-model approaches, phenotypes measured in the lab might not be natural, and the  
379 “wild” is where organisms interact with their environment (Hendry, 2017).

380

381 The study of eco-evolutionary dynamics was born from the recognition of widespread  
382 contemporary evolution and the cyclical feedback with ecological processes (Hendry, 2017). With this  
383 dataset, we identified some patterns of contemporary evolution (e.g., pollution is the strongest human  
384 influence on phenotypic rates of change) and we can use this information to broaden our understanding  
385 of eco-evolutionary feedbacks in the wild. We suggest that the next step is to understand how the  
386 feedback dynamics implicit to eco-evolutionary dynamics mechanistically shape emergent patterns of  
387 contemporary evolution: are some systems more feedback prone and thus have faster or slower rates of  
388 evolution? To address such feedback dynamics, we support the development of a comprehensive  
389 database which includes not only phenotypic rates of change but also ecological and environmental  
390 rates of change and estimates of selection.

391 Whilst this dataset can be a steppingstone to further our understanding of eco-evolutionary  
392 dynamics, we also advocate that this dataset can allow us to move beyond ‘traditional’ ecological and  
393 evolutionary patterns and start to consider societal consequences. In the past, the starting point for the

394 study of contemporary evolution was often population dynamics: “*perhaps the greatest contribution*  
395 *that evolutionary rate estimates will ultimately make is an awareness of our own role in the present*  
396 *microevolution of life and cautious consideration of whether populations and species can adapt rapidly*  
397 *enough to forestall the macroevolutionary endpoint of extinction*” (Hendry & Kinnison, 1999). What is  
398 now needed is a widespread and formal assessment of how trait changes, alone and in aggregate (e.g.,  
399 Kinnison et al., 2008; Westley, Ward, & Fleming, 2013, Calow, 1987), affect fitness, function, and  
400 species interactions in ways that shape ecological processes such as population dynamics, communities,  
401 and ecosystems, as well as the societal consequences such as the health and well-being of people (Des  
402 Roches et al., 2018; Hendry, 2017; Hendry, Gotanda, & Svensson, 2017; Palkovacs, Kinnison, Correa,  
403 Dalton, & Hendry, 2012; Stange, Barrett, & Hendry, 2021; Fig. 6). For example, we propose that more  
404 studies need to empirically study such feedbacks while also assessing the impacts on nature’s  
405 contributions to people (NCPs). Oke et al., (2020) provide a compelling example, by comparing the  
406 average body size of Alaskan chinook salmon pre-1990 to the average post-2010. The authors estimate  
407 that the overall average 8% decrease in body length could – all else being equal – translate into a 16%  
408 decrease in number of eggs per female, a 28% decrease in transport of marine-derived phosphorous  
409 into freshwater, a 26% reduction in average number of meals provided per fish for people in  
410 subsistence communities, and a 21% decrease in price per pound for commercial fishers.

411 We would like to close by re-emphasizing that the most dramatic progress will be made through  
412 studies that explicitly examine the *consequences* of phenotypic change. That is, more studies should  
413 formally calculate the importance of observed (and predicted) phenotypic change for all levels of  
414 ecology (populations, communities, ecosystems) and for people (nature’s contributions to people).  
415 Determining the genetic and plastic contributions to that change (and its consequences) can then help to  
416 determine the limits and opportunities for enhancing or arresting trait changes via conservation and  
417 management actions. We here present a hypothetical scenario of such a study using observed rates of

418 change (Fig. 6) where the amount of phenotypic change is correlated with an ecological process that is  
419 linked to nature's contributions to people. The present paper is not the end of an inspiring era of  
420 contemporary evolution – it is instead part of the start of an upcoming critical era of contemporary eco-  
421 evolutionary dynamics.

422

## 423 ACKNOWLEDGEMENTS

424 This work has been supported by NSF OIA 1826777 and NSF OAI 1849227 received by Micheal  
425 Kinnison. We thank the numerous researchers that shared their data and contributed to the development  
426 of The Phenotypic Rates of Change Evolutionary and Ecological Database (PROCEED) Version 5.0.  
427 We are especially grateful to both the Carnegie Museum of Natural History and the Powdermill Avian  
428 Research Center for sharing their data.

429

430 [dataset] Sarah Sanderson, Marc-Olivier Beausoleil, Rose E. O'Dea, Zachary T. Wood, Cristian  
431 Correa, Victor Frankel, Lucas D. Gorné, Grant E. Haines, Michael T. Kinnison, Krista B. Oke, Fanie  
432 Pelletier, Felipe Pérez-Jvostov, Winer Daniel Reyes-Corral, Yanny Ritchot, Freedom Sorbara, Kiyoko  
433 M. Gotanda, and Andrew P. Hendry; 2021; Database reference: Phenotypic Rates of Change  
434 Evolutionary and Ecological Database (PROCEED). <https://proceeddatabase.weebly.com>; Version 5.0

435

436 **Box 1. Definitions of the different types of data included in the data set.**

- 437 1. System: Each system has its own unique species, disturbance, and location (population).  
438 Within a given system, you can have multiple traits – for example, tarsus length and  
439 fledging date.
- 440 2. Disturbance: See Box 2.
- 441 3. Trait Classification: Traits were classified as determined by Kingsolver and Diamond  
442 2011: size, other morphology, phenology, other life history traits, behaviour, or  
443 physiology.
- 444 4. Study type: Studies were determined to be phenotypic in nature if traits were studied in  
445 natural populations and studies were determined to be genetic in nature if they used  
446 common-garden or quantitative genetic methods (i.e., animal model analyses). We note  
447 that studies classified as phenotypic could have a genetic basis (see introduction), but  
448 that we could not determine that from the methods of the study.
- 449 5. Design: Data were determined to be either allochronic (same population/different time  
450 points) or synchronic (populations with known divergence time).
- 451 6. Data scale: Data were determined to be ratio (constant interval with a precise zero; e.g.,  
452 mass or length) or interval (constant interval with an arbitrary zero; e.g., temperature or  
453 time of day).
- 454 7. Generation time: The amount of time to reproductive age, given in years.

455

456 **Box 2. Definitions of the different types of human disturbance categories used in the updated**  
457 **database.**

- 458  Introductions: “when humans transferred a species to a new geographical location, and  
459 comparisons were then made between introduced and ancestral populations (Carroll et al.,  
460 2005)”.
- 461
- 462  Response to introductions: when a local population of a species is responding to the  
463 introduction of a species.
- 464
- 465  Landscape change: when any type of modification to the habitat of a population occurs.
- 466
- 467  Hunting/Harvesting: when there is hunting or harvesting of a species by humans.
- 468
- 469  Pollution: when any type of pollutant enters a system.
- 470
- 471  Climate change: when the objectives of the study are directly linked to climate change.
- 472
- 473  Natural: established populations that are not subject to obvious human impacts (as listed  
474 above). Generally, these studies were the long-term monitoring of natural populations.
- 475

476 REFERENCES

477

- 478 Alberti, M., Correa, C., Marzluff, J. M., Hendry, A. P., Palkovacs, E. P., Gotanda, K. M., ... Zhou, Y.  
479 (2017). Global urban signatures of phenotypic change in animal and plant populations.  
480 *Proceedings of the National Academy of Sciences*, 114(34), 8951–8956. doi:  
481 10.1073/pnas.1606034114
- 482 Al-Hiyaly, S. A. K., Mcneilly, T., & Bradshaw, A. D. (1990). The effect of zinc contamination from  
483 electricity pylons. Contrasting patterns of evolution in five grass species. *New Phytologist*,  
484 114(2), 183–190. doi: 10.1111/j.1469-8137.1990.tb00389.x
- 485 Antonovics, J., & Bradshaw, A. D. (1970). Evolution in closely adjacent plant populations. VIII. Clinal  
486 patterns at a mine boundary. *Heredity*, 25, 349–362. doi: 10.1038/hdy.1970.36
- 487 Berry, R. J. (1964). The evolution of an island population of the house mouse. *Evolution*, 18(3), 468–  
488 483. doi: 10.2307/2406357
- 489 Blumstein, D. T., & Daniel, J. C. (2003). Foraging behavior of three Tasmanian macropodid marsupials  
490 in response to present and historical predation threat. *Ecography*, 26(5), 585–594.
- 491 Calow, P. (1987). Towards a definition of functional ecology. *Functional Ecology*, 1(1), 57–61. doi:  
492 10.2307/2389358
- 493 Carroll, S. P. (2007). Natives adapting to invasive species: Ecology, genes, and the sustainability of  
494 conservation. *Ecological Research*, 22(6), 892–901. doi: 10.1007/s11284-007-0352-5
- 495 Carroll, S. P., Klassen, S. P., & Dingle, H. (1998). Rapidly evolving adaptations to host ecology and  
496 nutrition in the soapberry bug. *Evolutionary Ecology*, 12(8), 955–968. doi:  
497 10.1023/A:1006568206413
- 498 Carroll, S. P., Loye, J. E., Dingle, H., Mathieson, M., Famula, T. R., & Zalucki, M. P. (2005). And the  
499 beak shall inherit—Evolution in response to invasion. *Ecology Letters*, 8(9), 944–951. doi:  
500 10.1111/j.1461-0248.2005.00800.x
- 501 Clark, J., Brenner, R., & Lewis, B. (2018). Compiled age, sex, and length data for Alaskan salmon,  
502 1922-2017. doi: 10.5063/F1707ZTM
- 503 Cope, E. D. (1885). On the evolution of the Vertebrata, progressive and retrogressive (continued). *The*  
504 *American Naturalist*, 19, 341–353.
- 505 Cox, G. W. (2004). *Alien species and evolution: The evolutionary ecology of exotic plants, animals,*  
506 *microbes, and interacting native species*. Washington: Island Press.
- 507 Crispo, E., Dibattista, J. D., Correa, C., Thibert-plante, X., Mckellar, A. E., Schwartz, A. K., ...  
508 Hendry, A. P. (2010). The evolution of phenotypic plasticity in response to anthropogenic  
509 disturbance. *Evolutionary Ecology Research*, 12, 47–66. doi: 10.1088/0004-637X/742/2/126
- 510 Czarnośki, M., Kozłowski, J., Lewandowski, K., Mikolajczyk, M., Müller, T., & Stanczykowska, A.  
511 (2005). Optimal resource allocation explains changes in the zebra mussel growth pattern  
512 through time. *Evolutionary Ecology Research*, 7, 821–835.
- 513 Darimont, C. T., Carlson, S. M., Kinnison, M. T., Paquet, P. C., Reimchen, T. E., & Wilmers, C. C.  
514 (2009). Human predators outpace other agents of trait change in the wild. *Proceedings of the*  
515 *National Academy of Sciences*, 106(3), 952–954. doi: 10.1073/pnas.0809235106
- 516 Darwin, C. (1859). *On the Origin of Species by means of natural selection, or preservation of flavoured*  
517 *racés in the struggle for life*. London: John Murray.
- 518 Des Roches, S., Post, D. M., Turley, N. E., Bailey, J. K., Hendry, A. P., Kinnison, M. T., ... Palkovacs,  
519 E. P. (2018). The ecological importance of intraspecific variation. *Nature Ecology & Evolution*,  
520 2(1), 57–64. doi: 10.1038/s41559-017-0402-5
- 521 Endler, J. A. (1986). *Natural selection in the wild*. Princeton University Press.

- 522 Fitzpatrick, C. R., Agrawal, A. A., Basiliko, N., Hastings, A. P., Isaac, M. E., Preston, M., & Johnson,  
523 M. T. J. (2015). The importance of plant genotype and contemporary evolution for terrestrial  
524 ecosystem processes. *Ecology*, *96*(10), 2632–2642. doi: 10.1890/14-2333.1
- 525 Franks, S. J., Sim, S., & Weis, A. E. (2007). Rapid evolution of flowering time by an annual plant in  
526 response to a climate fluctuation. *Proceedings of the National Academy of Sciences*, *104*(4),  
527 1278–1282. doi: 10.1073/pnas.0608379104
- 528 Fryxell, D. C., Hoover, A. N., Alvarez, D. A., Arnesen, F. J., Benavente, J. N., Moffett, E. R., ...  
529 Palkovacs, E. P. (2020). Recent warming reduces the reproductive advantage of large size and  
530 contributes to evolutionary downsizing in nature. *Proceedings of the Royal Society B:  
531 Biological Sciences*, *287*(1928), 20200608. doi: 10.1098/rspb.2020.0608
- 532 Galton, F. (1886). Regression towards mediocrity in hereditary stature. *The Journal of the  
533 Anthropological Institute of Great Britain and Ireland*, *15*, 246–263.
- 534 Gardner, J. L., Peters, A., Kearney, M. R., Joseph, L., & Heinsohn, R. (2011). Declining body size: A  
535 third universal response to warming? *Trends in Ecology & Evolution*, *26*(6), 285–291. doi:  
536 10.1016/j.tree.2011.03.005
- 537 Gingerich, P. (1983). Rates of evolution: Effects of time and temporal scaling. *Science*, *222*, 159–162.  
538 doi: 10.1126/science.222.4620.159
- 539 Gingerich, P. (1993). Quantification and comparison of evolutionary rates. *American Journal of  
540 Science*, *293*-A, 453–478.
- 541 Gorné, L. D., & Díaz, S. (2019). Meta-analysis shows that rapid phenotypic change in angiosperms in  
542 response to environmental change is followed by stasis. *The American Naturalist*, *194*(6), 840–  
543 853. doi: 10.1086/705680
- 544 Gotanda, K. M., Correa, C., Turcotte, M. M., Rolshausen, G., & Hendry, A. P. (2015). Linking  
545 macro-trends and microrates: Re-evaluating microevolutionary support for Cope’s rule.  
546 *Evolution*, *69*(5), 1345–1354. doi: 10.1111/evo.12653
- 547 Grant, P. R., & Grant, B. R. (2002). Unpredictable evolution in a 30-year study of Darwin’s finches.  
548 *Science*, *296*(5568), 707–711. doi: 10.1126/science.1070315
- 549 Haldane, J. B. S. (1949). Suggestions as to quantitative measurement of rates of evolution. *Evolution*,  
550 *3*(1), 51–56. doi: 10.2307/2405451
- 551 Hamilton, P. B., Rolshausen, G., Uren Webster, T. M., & Tyler, C. R. (2017). Adaptive capabilities and  
552 fitness consequences associated with pollution exposure in fish. *Philosophical Transactions of  
553 the Royal Society of London. Series B, Biological Sciences*, *372*(1712), 20160042. doi:  
554 10.1098/rstb.2016.0042
- 555 Hendry, A. P. (2017). *Eco-evolutionary dynamics*. Princeton University Press.
- 556 Hendry, A. P., Farrugia, T. J., & Kinnison, M. T. (2008). Human influences on rates of phenotypic  
557 change in wild animal populations. *Molecular Ecology*, *17*(1), 20–29. doi: 10.1111/j.1365-  
558 294X.2007.03428.x
- 559 Hendry, A. P., Gotanda, K. M., & Svensson, E. I. (2017). Human influences on evolution, and the  
560 ecological and societal consequences. *Philosophical Transactions of the Royal Society B:  
561 Biological Sciences*, *372*(1712). doi: 10.1098/rstb.2016.0028
- 562 Hendry, A. P., & Kinnison, M. T. (1999). Perspective: The pace of modern life: Measuring rates of  
563 contemporary microevolution. *Evolution*, *53*(6), 1637–1653. doi: 10.2307/2640428
- 564 Hendry, A. P., & Kinnison, M. T. (2001). An introduction to microevolution: Rate, pattern, process.  
565 *Genetica*, *112*(1), 1–8. doi: 10.1023/A:1013368628607
- 566 Hothorn, T., Bretz, F., & Westfall, P. (2008). Simultaneous inference in general parametric models.  
567 *Biometrical Journal*, *50*(3), 346–363. doi: 10.1002/bimj.200810425



- 568 Huey, R., Gilchrist, G., & Hendry, A. P. (2005). Using Invasive Species to Study Evolution: Case  
569 studies with *Drosophila* and Salmon. In *Species invasions: Insights into ecology, evolution and*  
570 *biogeography* (p. 139-164). Sinauer Associates.
- 571 Hunt, G. (2012). Measuring rates of phenotypic evolution and the inseparability of tempo and mode.  
572 *Paleobiology*, 38(03), 351–373. doi: 10.1666/11047.1
- 573 Jenni, L., & Kéry, M. (2003). Timing of autumn bird migration under climate change: Advances in  
574 long-distance migrants, delays in short-distance migrants. *Proceedings. Biological Sciences*,  
575 270(1523), 1467–1471. doi: 10.1098/rspb.2003.2394
- 576 Johnston, R. F., & Selander, R. K. (1964). House Sparrows: Rapid evolution of races in North  
577 America. *Science*, 144(3618), 548–550. doi: 10.1126/science.144.3618.548
- 578 Kelly, C., & Price, P. D. (2017). Correcting for Regression to the Mean in Behavior and Ecology. *The*  
579 *American Naturalist*, 166(6), 700–700. doi: 10.2307/3491232
- 580 Kettlewell, H. (1973). *Evolution of melanism: The study of a recurring necessity*. Oxford: Clarendon  
581 Press.
- 582 Kingsolver, J. G., Hoekstra, H. E., Hoekstra, J. M., Berrigan, D., Vignieri, S. N., Hill, C. E., ... Beerli,  
583 P. (2001). The strength of phenotypic selection in natural populations. *The American Naturalist*,  
584 157(3), 245–261. doi: 10.1086/319193
- 585 Kingsolver, J., & Pfennig, D. (2004). Individual-level selection as a cause of Cope's Rule of phyletic  
586 size increase. *Evolution; International Journal of Organic Evolution*, 58, 1608–1612. doi:  
587 10.1111/j.0014-3820.2004.tb01740.x
- 588 Kinnison, M. T., & Hairston, N. G. (2007). Eco-evolutionary conservation biology: Contemporary  
589 evolution and the dynamics of persistence. *Functional Ecology*, 21(3), 444–454. doi:  
590 10.1111/j.1365-2435.2007.01278.x
- 591 Kinnison, M. T., Unwin, M. J., & Quinn, T. P. (2008). Eco-evolutionary vs. Habitat contributions to  
592 invasion in salmon: Experimental evaluation in the wild. *Molecular Ecology*, 17(1), 405–414.  
593 doi: 10.1111/j.1365-294X.2007.03495.x
- 594 Kuparinen, A., & Festa-Bianchet, M. (2017). Harvest-induced evolution: Insights from aquatic and  
595 terrestrial systems. *Philosophical Transactions of the Royal Society B: Biological Sciences*,  
596 372(1712), 20160036. doi: 10.1098/rstb.2016.0036
- 597 Law, W., & Salick, J. (2005). Human-induced dwarfing of Himalayan snow lotus, *Saussurea laniceps*  
598 (Asteraceae). *Proceedings of the National Academy of Sciences*, 102(29), 10218–10220. doi:  
599 10.1073/pnas.0502931102
- 600 Legrand, D., Cote, J., Fronhofer, E. A., Holt, R. D., Ronce, O., Schtickzelle, N., ... Clobert, J. (2017).  
601 Eco-evolutionary dynamics in fragmented landscapes. *Ecography*, 40(1), 9–25. doi:  
602 10.1111/ecog.02537
- 603 Merilä, J., & Hendry, A. P. (2014). Climate change, adaptation, and phenotypic plasticity: The problem  
604 and the evidence. *Evolutionary Applications*, 7(1), 1–14. doi: 10.1111/eva.12137
- 605 Morrissey, M. B., Hubbs, A., & Festa-Bianchet, M. (2021). Horn growth appears to decline under  
606 intense trophy hunting, but biases in hunt data challenge the interpretation of the evolutionary  
607 basis of trends. *Evolutionary Applications*, 14(6), 1519–1527. doi: 10.1111/eva.13207
- 608 Ohlberger, J., Schindler, D. E., Brown, R. J., Harding, J. M. S., Adkison, M. D., Munro, A. R., ...  
609 Spaeder, J. (2020). The reproductive value of large females: Consequences of shifts in  
610 demographic structure for population reproductive potential in Chinook salmon. *Canadian*  
611 *Journal of Fisheries and Aquatic Sciences*, 77(8), 1292–1301. doi: 10.1139/cjfas-2020-0012
- 612 Oke, K. B., Cunningham, C. J., Westley, P. A. H., Baskett, M. L., Carlson, S. M., Clark, J., ...  
613 Palkovacs, E. P. (2020). Recent declines in salmon body size impact ecosystems and fisheries.  
614 *Nature Communications*, 11(1), 4155. doi: 10.1038/s41467-020-17726-z

- 615 Palkovacs, E. P., Kinnison, M. T., Correa, C., Dalton, C. M., & Hendry, A. P. (2012). Fates beyond  
616 traits: Ecological consequences of human-induced trait change. *Evolutionary Applications*, 5(2),  
617 183–191. doi: 10.1111/j.1752-4571.2011.00212.x
- 618 Palkovacs, E. P., Wasserman, B. A., & Kinnison, M. T. (2011). Eco-evolutionary trophic dynamics:  
619 Loss of top predators drives trophic evolution and ecology of prey. *PLoS ONE*, 6(4), e18879–  
620 e18879. doi: 10.1371/journal.pone.0018879
- 621 Parmesan, C., & Yohe, G. (2003). A globally coherent fingerprint of climate change impacts across  
622 natural systems. *Nature*, 421(6918), 37–42. doi: 10.1038/nature01286
- 623 Pelletier, F., & Coltman, D. W. (2018). Will human influences on evolutionary dynamics in the wild  
624 pervade the Anthropocene? *BMC Biology*, 16(1), 1–10. doi: 10.1186/s12915-017-0476-1
- 625 Pigeon, G., Festa-Bianchet, M., Coltman, D. W., & Pelletier, F. (2016). Intense selective hunting leads  
626 to artificial evolution in horn size. *Evolutionary Applications*, 9(4), 521–530. doi:  
627 10.1111/eva.12358
- 628 R Core Team (2020). R: A language and environment for statistical computing. R Foundation for  
629 Statistical Computing, Vienna, Austria.
- 630 Reznick, D. (1982). The impact of predation on life history evolution in Trinidadian Guppies: Genetic  
631 basis of observed life history patterns. *Evolution*, 36(6), 1236–1250. doi: 10.2307/2408156
- 632 Schluter, D. (2000). Ecological character displacement in adaptive radiation. *The American Naturalist*,  
633 156(4), S4–S16. doi: 10.2307/3079223
- 634 Sharpe, D. M. T., & Hendry, A. P. (2009). Life history change in commercially exploited fish stocks:  
635 An analysis of trends across studies. *Evolutionary Applications*, 2(3), 260–275. doi:  
636 10.1111/j.1752-4571.2009.00080.x
- 637 Sheridan, J. A., & Bickford, D. (2011). Shrinking body size as an ecological response to climate  
638 change. *Nature Climate Change*, 1(8), 401–406. doi: 10.1038/nclimate1259
- 639 Siepielski, A. M., Gotanda, K. M., Morrissey, M. B., Diamond, S. E., DiBattista, J., & Carlson, S. M.  
640 (2013). The spatial patterns of directional phenotypic selection. *Ecology Letters*, 16(11), 1382–  
641 1392. doi: 10.1111/ele.12174
- 642 Stange, M., Barrett, R. D. H., & Hendry, A. P. (2021). The importance of genomic variation for  
643 biodiversity, ecosystems and people. *Nature Reviews Genetics*, 22(2), 89–105. doi:  
644 10.1038/s41576-020-00288-7
- 645 Stearns, S. C. (1983). The genetic basis of differences in life-history traits among six populations of  
646 Mosquitofish (*Gambusia affinis*) that shared ancestors in 1905. *Evolution*, 37(3), 618–627. doi:  
647 10.2307/2408274
- 648 Sullivan, A. P., Bird, D. W., & Perry, G. H. (2017). Human behaviour as a long-term ecological driver  
649 of non-human evolution. *Nature Ecology & Evolution*, 1(3), 1–11. doi: 10.1038/s41559-016-  
650 0065
- 651 Van de Walle, J., Pigeon, G., Zedrosser, A., Swenson, J. E., & Pelletier, F. (2018). Hunting regulation  
652 favors slow life histories in a large carnivore. *Nature Communications*, 9(1), 1100. doi:  
653 10.1038/s41467-018-03506-3
- 654 Westley, P. A. H. (2011). What invasive species reveal about the rate and form of contemporary  
655 phenotypic change in nature. *The American Naturalist*, 177(4), 496–509. doi: 10.1086/658902
- 656 Westley, P. A. H., Ward, E. J., & Fleming, I. A. (2013). Fine-scale local adaptation in an invasive  
657 freshwater fish has evolved in contemporary time. *Proceedings of the Royal Society B:  
658 Biological Sciences*, 280(1751), 20122327. doi: 10.1098/rspb.2012.2327
- 659 Wu, L., & Kruckeberg, A. L. (1985). Copper tolerance in two legume species from a copper mine  
660 habitat. *New Phytologist*, 99(4), 565–570. doi: 10.1111/j.1469-8137.1985.tb03684.x  
661



662 AUTHOR CONTRIBUTIONS:

663 Ideas: SS, MOB, ROE, VF, MTK, APH, KMG, CC

664 Data contributions: SS, MOB, GH, REO, WDR, KBO, KMG, YR, LG, FP, ZTW, APH

665 Analyses: SS, MOB, CC, REO, ZTW, KMG

666 Writing: SS, KMG, APH, with contributions from all authors

667

668 CONFLIT OF INTEREST

669 The authors declare no conflict of interest

670

671 DATA AVAILABILITY STATEMENT

672 The dataset used in this manuscript will be archived on DRYAD and is available at

673 <https://proceeddatabase.weebly.com/>.

674 TABLES AND FIGURES

675

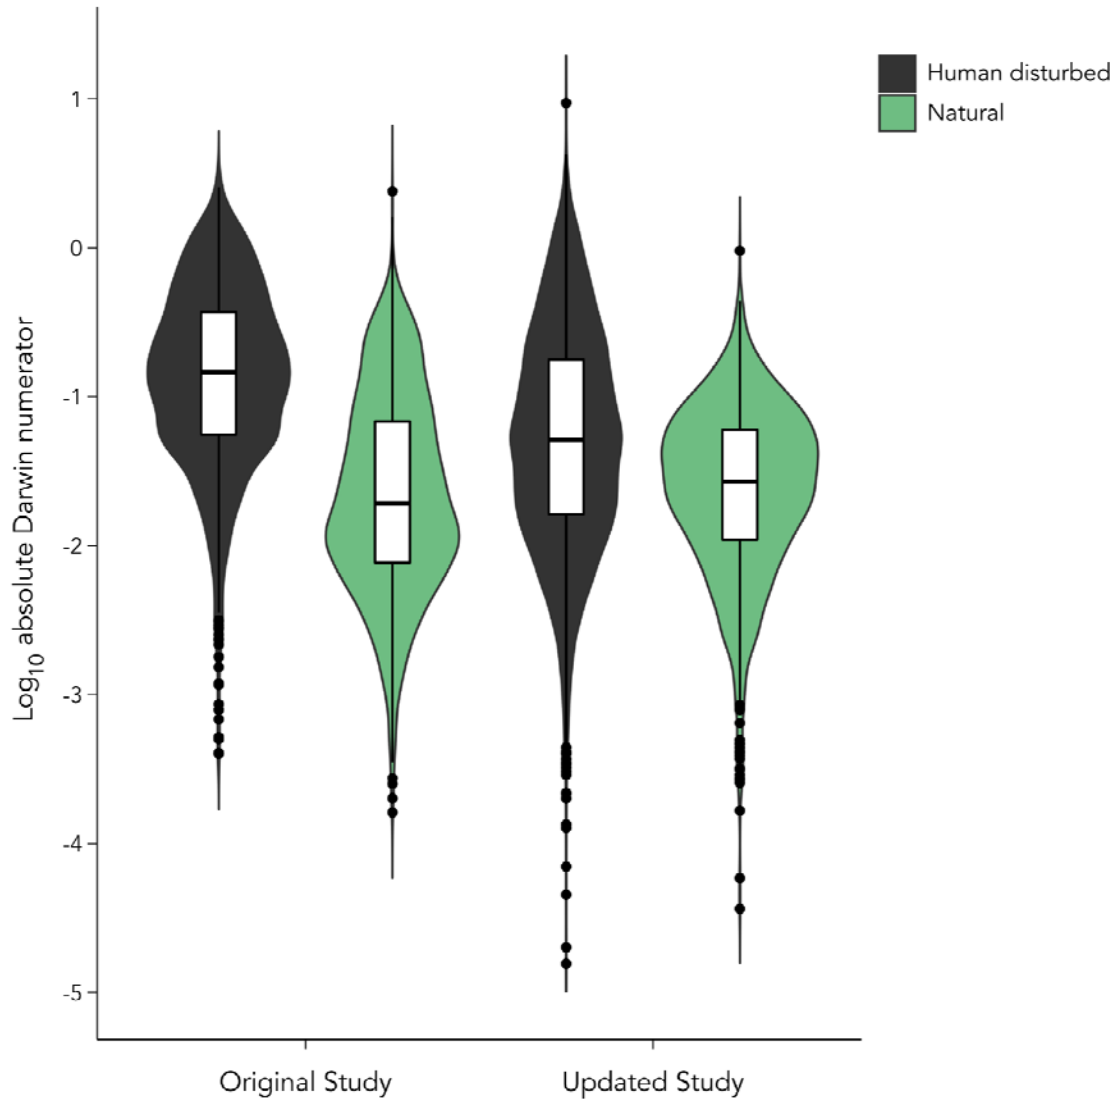

676

677

678 **Figure 1.** Violin plot of rates of phenotypic change (log-transformed darwin numerator) comparing  
679 natural (green) and human disturbed (black) systems. The two left violins are data from Hendry et al.,  
680 (2008) and the two right violins are from our updated dataset. Axes were cut for better visualization (2  
681 outliers removed from figure).

682

683

684

685

686

687

688

689

690  
691

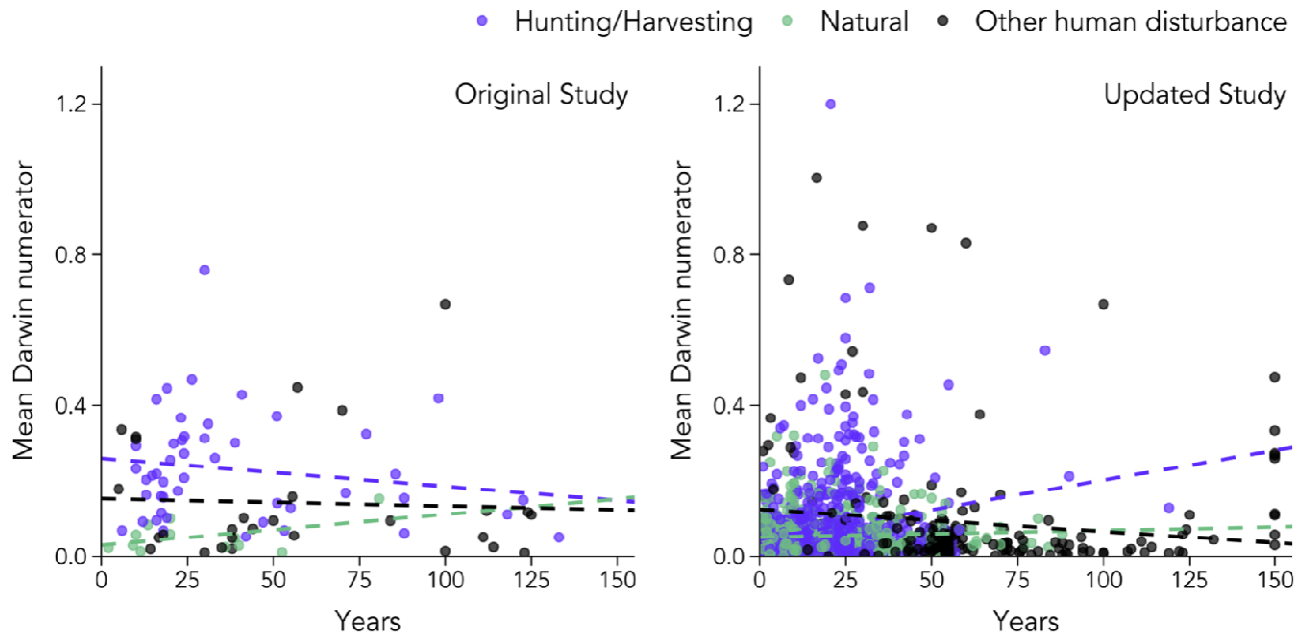

692

693 **Figure 2.** Rates of phenotypic change (mean darwin numerator) for hunted/harvested systems (purple),  
694 natural systems (green), and other types of human disturbed systems (black). Rates of change are  
695 averaged values per study system. Left panel is data from Darimont et al., (2009) and the right panel is  
696 our current dataset.  
697

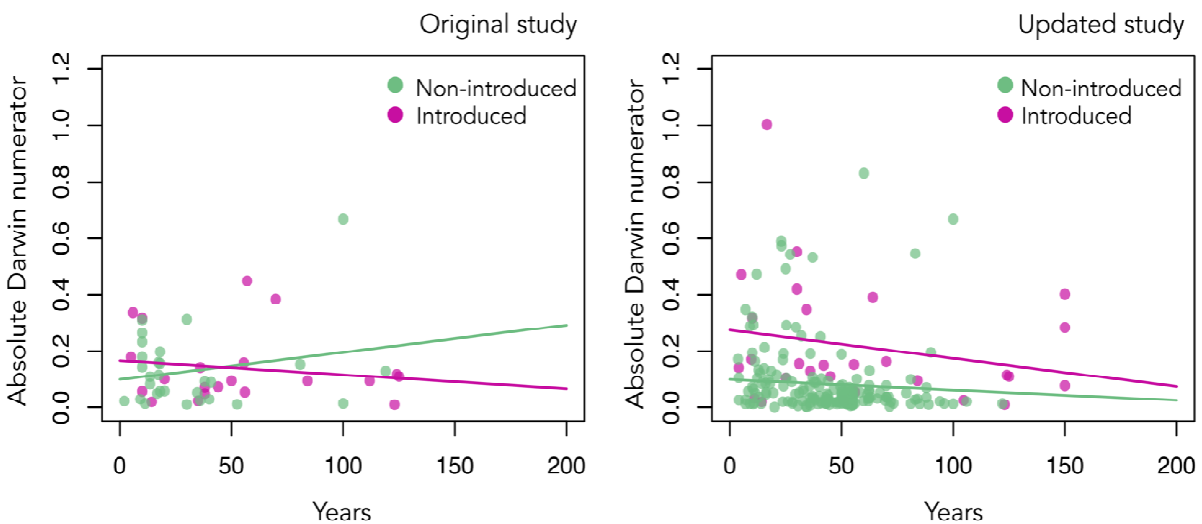

698  
699  
700  
701  
702  
703

698 **Figure 3.** Absolute phenotypic change in introduced species (pink) and non-introduced species (green)  
699 measured in absolute darwin numerators. Each point is an expression at the species taxonomic level.  
700 Darwin numerators are plotted as a function of years. The left panel is data from Westley (2011) and  
701 the right panel is our updated dataset.  
702  
703

704

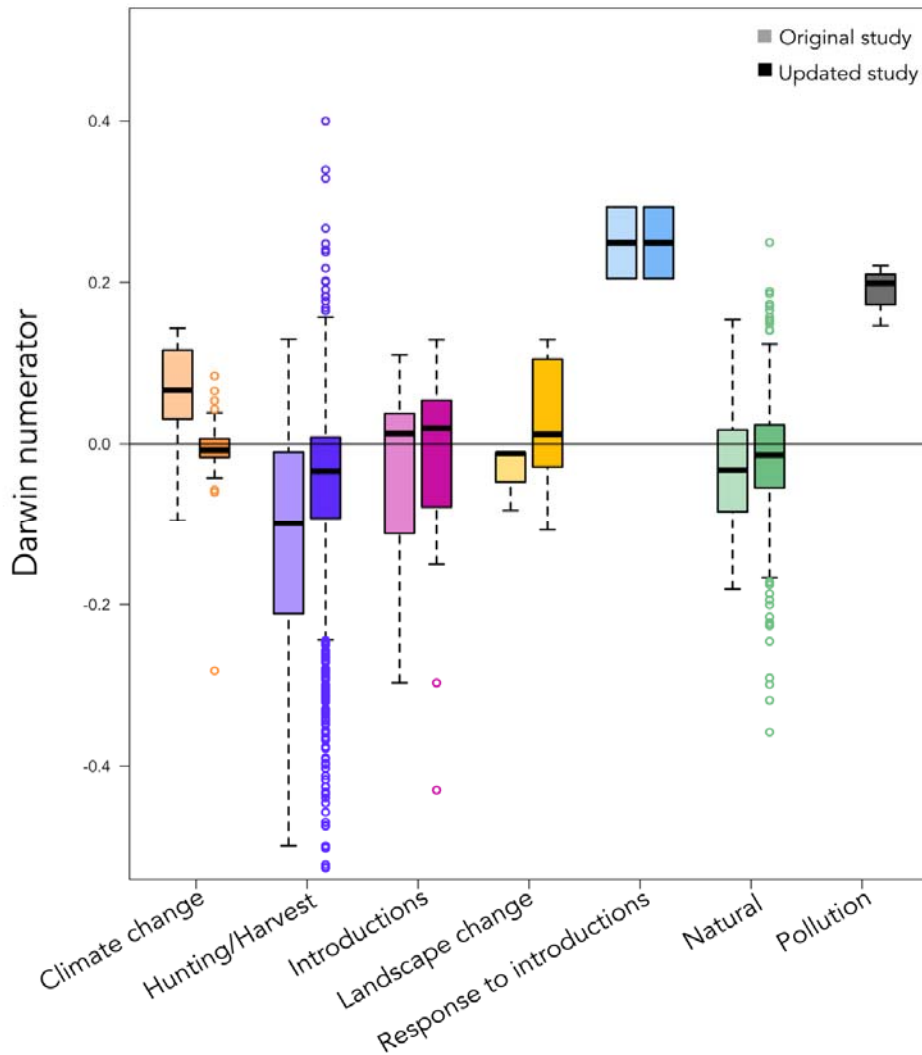

705

706

707

708

709

710

711

712

713

714

715

716

717

718

719

720

721

**Figure 4.** Boxplots depicting rates of change associated with body size measured in darwin numerators for each disturbance category (climate change, hunting/harvesting, introduction, landscape change, response to introductions, natural, and pollution). Light boxes are results from Gotanda et al., (2015) and dark boxes are results from our updated dataset. Y axis was truncated to aid in visual assessment.

722

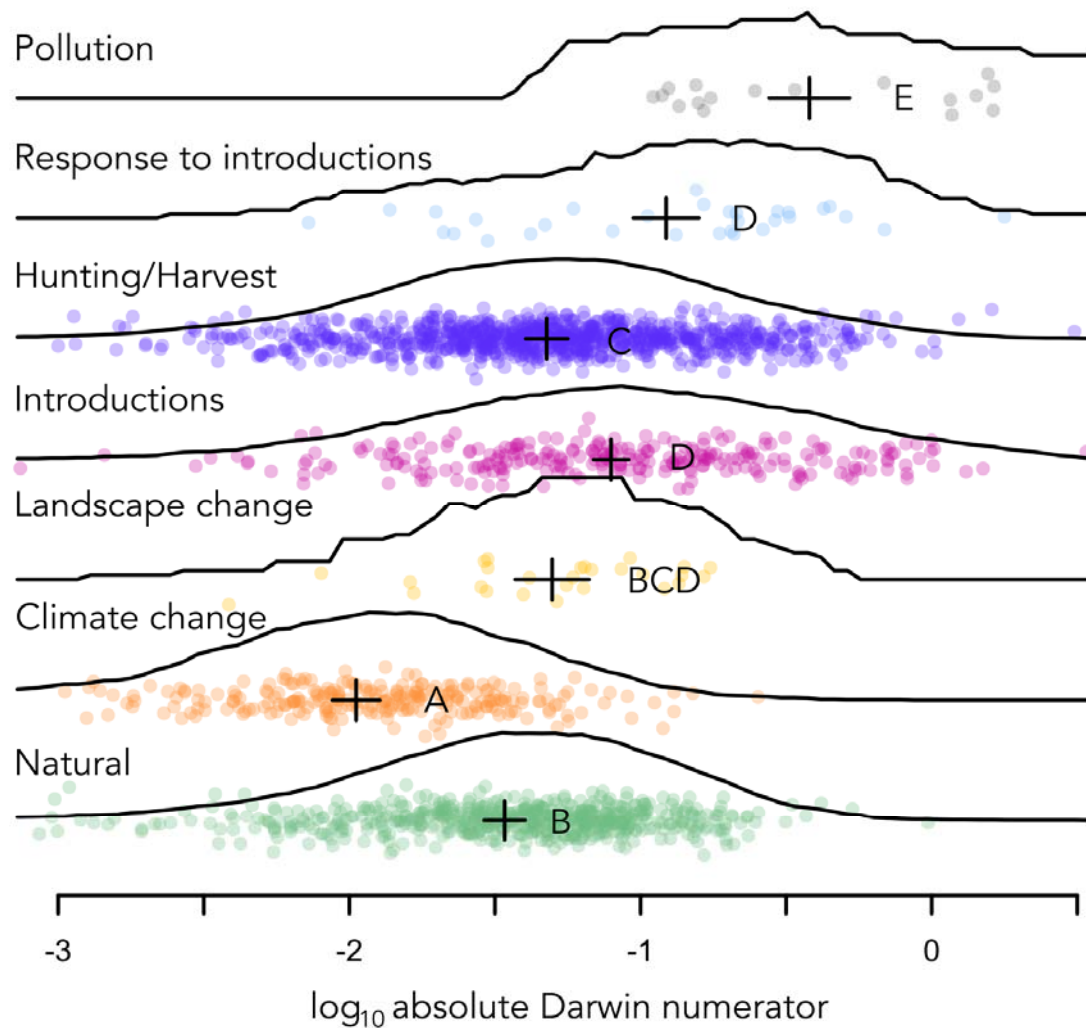

723

724

725

726

727

728

729

730

731

732

733

734

735

**Figure 5.** Rates of evolution—in log-transformed absolute darwin numerators—for six types of disturbances (pollution, response to introductions, hunting/harvest, introductions, landscape change, climate change) and natural populations. Points show individual data, lines show smoothed data distributions, and crosses show GLM estimates  $\pm$  standard errors. Letters indicate characterisations based on Tukey HSD tests. Each point represents a system and reference-specific average.

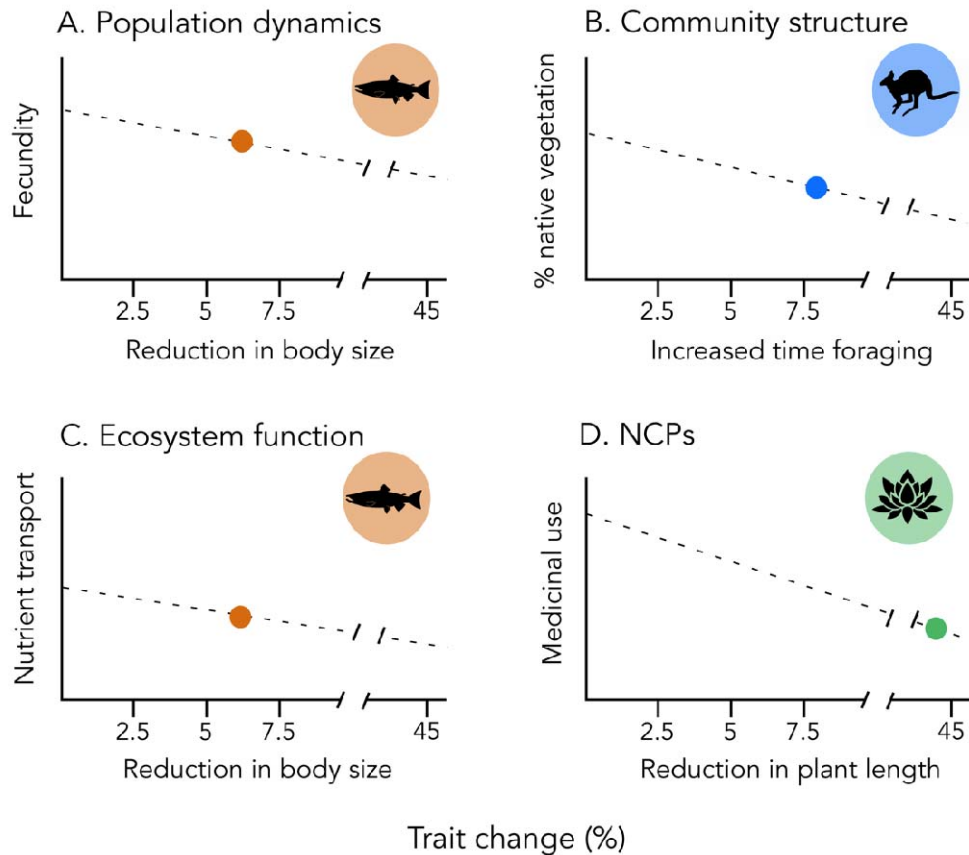

736

737

738

739

740

741

742

743

744

745

746

747

**Figure 6.** Hypothetical effects of observed phenotypic change for all levels of ecology (populations, communities, ecosystems, and nature's contribution to people (NCPs)). A) 5-7% decrease in body size in harvested Chinook salmon (*Oncorhynchus tshawytscha*) in the Yukon River (Ohlberger et al., 2020) could decrease fish fecundity, affecting fishery yields. B) 8% increase in time spent foraging in Forester kangaroos (*Macropus giganteus*) introduced to Maria Island (Blumstein & Daniel, 2003) could affect the composition makeup of native vegetation and have effects on ecosystem processes like pollination. C) 5-7% decrease in body size in harvested Chinook salmon in the Yukon River (Ohlberger et al., 2020) could decrease nutrient transport affecting ecosystem properties. D) 43 % decrease in plant length in harvested Himalayan snow lotus (*Saussurea laniceps*) (Law & Salick, 2005) will decrease plant availability for medicinal use by humans.

748 **Table 1.** Partial  $\eta^2$  values for darwin numerators and their appropriate models for each study revisited. Type refers to if the data were from a  
 749 phenotypic study or a genotypic study (e.g., common garden).  
 750  
 751

| Question                | Data processing                                   | Model                                                                    | N original | N updated | Explanatory variable | Effect size original | Effect size updated |
|-------------------------|---------------------------------------------------|--------------------------------------------------------------------------|------------|-----------|----------------------|----------------------|---------------------|
| Hendry et al., (2008)   | Raw data                                          | Absolute Darwin numerators<br>~ years * human influence                  | 2844       | 6957      | Years                | 0.004                | 0.006               |
|                         |                                                   |                                                                          |            |           | Human Influence      | 0.115                | 0.018               |
| Darimont et al., (2009) | Averaged by system, phenotypic data               | Absolute Darwin numerators (means) ~ human influence + years             | 87         | 1529      | Years                | 0.010                | 0.002               |
|                         |                                                   |                                                                          |            |           | Human Influence      | 0.180                | 0.010               |
| Westley (2011)          | Averaged by species                               | Absolute Darwin numerators ~ introductions * years                       | 90         | 276       | Years                | 0.613                | 0.135               |
| New                     | Averaged by system and polynomial transformations | Log absolute Darwin numerators ~ disturbance + type + years +generations |            | 2109      | Introductions        | 0.781                | 0.906               |
|                         |                                                   |                                                                          |            |           | Years                |                      | 0.959               |
|                         |                                                   |                                                                          |            |           | Disturbance          |                      | 0.998               |
|                         |                                                   |                                                                          |            |           | Type                 |                      | 0.041               |

752  
 753  
 754

755  
756  
757  
758

**Table 2.** Pairwise Wilcoxon signed-rank test results for size *versus* a different phenotypic trait (one-sided) to see if rates of evolution for body size were higher than other traits. Bold indicates significant P values where body size rates are higher than the other phenotypic trait, though not necessarily *positive*. Trait classification followed the definitions found in Kingsolver and Diamond (2011).

|            |         | 2015       |           |                |            | 2021       |           |                |            |
|------------|---------|------------|-----------|----------------|------------|------------|-----------|----------------|------------|
|            |         | Other      | Phenology | Other life     | Physiology | Other      | Phenology | Other life     | Physiology |
|            |         | morphology |           | history traits |            | morphology |           | history traits |            |
| Darwins    | W       | 69532      | 6326      | 1313           | 3311       | 999128     | 89790     | 192019         | 50292      |
|            | P value | 1          | 1         | <b>0.025</b>   | 0.997      | 1          | 0.938     | 0.180          | 0.959      |
| Darwin     | W       | 69428      | 6339      | 1712           | 3525       | 1008067    | 89545     | 195065         | 55501      |
| numerators | P value | 1          | 1         | 0.429          | 1          | 1          | 0.932     | 0.290          | 0.999      |
| Haldanes   | W       | 26355      | 2560      | 835            | 1316       | 779302     | 73446     | 50376          | 38219      |
|            | P value | 0.821      | 0.084     | 0.607          | 0.922      | 1          | 0.982     | 0.661          | 0.924      |
| Haldane    | W       | 26151      | 3525      | 773            | 1289       | 765025     | 70326     | 49636          | 40013      |
| numerators | P value | 0.790      | 0.983     | 0.390          | 0.889      | 1          | 0.912     | 0.585          | 0.979      |

759  
760  
761  
762  
763  
764  
765  
766

bioRxiv preprint doi: <https://doi.org/10.1101/2021.07.30.454364>; this version posted August 1, 2021. The copyright holder for this preprint (which was not certified by peer review) is the author/funder, who has granted bioRxiv a license to display the preprint in perpetuity. It is made available under aCC-BY-NC-ND 4.0 International license.



767 **Table 3.** Sign-test results for rates of evolution testing whether body size rates were significantly different from zero. Results are shown for  
 768 all data and for data with harvesting data removed. Median rates are given, and bold values mean the median is significantly different from  
 769 zero. Due to the nature of the sign test, numerators yield the exact same results, and so are not reported. Body size classification followed the  
 770 trait classification definitions found in Kingsolver and Diamond (2011).  
 771  
 772

|          |               | 2015             | 2021             | 2015 (no harvesting) | 2021 (no harvesting) |
|----------|---------------|------------------|------------------|----------------------|----------------------|
| Darwins  | N (body size) | 146              | 1902             | 87                   | 705                  |
|          | Median        | -1763            | -1306            | -711                 | -372.842             |
|          | p-value       | <b>&lt;0.001</b> | <b>&lt;0.001</b> | <b>0.018</b>         | <b>&lt;0.001</b>     |
| Haldanes | N (body size) | 70               | 1576             | 67                   | 682                  |
|          | Median        | -0.00028         | -0.0396          | -0.00197             | -0.0167              |
|          | p-value       | 0.403            | <b>&lt;0.001</b> | 0.625                | <b>&lt;0.001</b>     |

773  
 774  
 775  
 776  
 777  
 778

779 **Table 4.** Estimates, standard errors, Tukey test categorizations, and type II likelihood ratio test results  
 780 for models predicting  $\log_{10}$  absolute value darwins.

781

782

783  **$\log_{10}$  darwins**

|             | <b>Variable</b>              | <b>Est.</b> | <b>SE</b> | <b>Tuke<br/>y</b> | $\chi^2$ | <b>df</b> | <b>p</b>       |
|-------------|------------------------------|-------------|-----------|-------------------|----------|-----------|----------------|
| Disturbance | Climate change               | -2.20       | 0.08      | a                 | 361.03   | 6         | < <b>0.001</b> |
|             | Hunting / harvesting         | -1.54       | 0.07      | c                 |          |           |                |
|             | Introduction                 | -1.32       | 0.06      | d                 |          |           |                |
|             | Landscape change             | -1.52       | 0.13      | bcd               |          |           |                |
|             | Local response to introduced | -1.13       | 0.11      | d                 |          |           |                |
|             | Other                        | -1.69       | 0.07      | b                 |          |           |                |
|             | Pollution                    | -0.64       | 0.14      | e                 |          |           |                |
|             | Phenotypic (vs. genetic)     | 0.01        | 0.06      |                   | 0.06     | 1         | 0.80           |
|             | $\log_{10}$ years            | 0.15        | 0.02      |                   | 34.76    | 1         | < <b>0.001</b> |
|             | $\log_{10}$ generations      | 0.05        | 0.04      |                   | 1.48     | 1         | 0.22           |

784

785

786
